# Supplementary material for: TiO2 nanocluster modified-rutile TiO2 photocatalyst: a first principles investigation
Source: Royal Society of Chemistry journal article supplement (doi:10.1039/c2ta01582j), 2013-01-01
Supplement: c2ta01582j.pdf [file c2ta01582j.pdf]

# TiO<sub>2</sub> Nanocluster Modified-Rutile TiO<sub>2</sub> Photocatalyst: a First Principles Investigation.

*Anna Iwaszuk<sup>a</sup>, P. A. Mulheran<sup>b</sup> and Michael Nolan<sup>a\*</sup>*

a: Tyndall National Institute, University College Cork, Lee Maltings, Prospect Row, Cork,  
Ireland

b: Department of Chemical Engineering, University of Strathclyde, Glasgow G1 1XQ, Scotland, UK

## Supporting information:

### The Supporting Information consists of

- 1. Figure S1:** Relaxed, but less stable, adsorption structures for Ti<sub>6</sub>O<sub>12</sub> nanocluster on rutile (110) surface
- 2. Figure S2:** Relaxed, less stable, adsorption structures for Ti<sub>8</sub>O<sub>16</sub>, Ti<sub>16</sub>O<sub>32</sub>, Ti<sub>30</sub>O<sub>60</sub> clusters on rutile (110).
- 3.** Details of calculation of energetics in cluster aggregation
- 4. Figure S3:** PEDOS of O 2p states in the adsorbed nanocluster for terminal oxygen (denoted O 2p terminal) and non-terminal oxygen (denoted O 2p non-term) for: (a)Ti<sub>5</sub>O<sub>10</sub>, (b)Ti<sub>6</sub>O<sub>12</sub>, (c)Ti<sub>16</sub>O<sub>32</sub>, (d)Ti<sub>30</sub>O<sub>60</sub> clusters on TiO<sub>2</sub> rutile (110) surface.
- 5. Figure S4:** Absorption spectrum of nanocluster modified rutile (110) showing a zoom into the region around the photon energy corresponding to the extrapolated absorption energy.

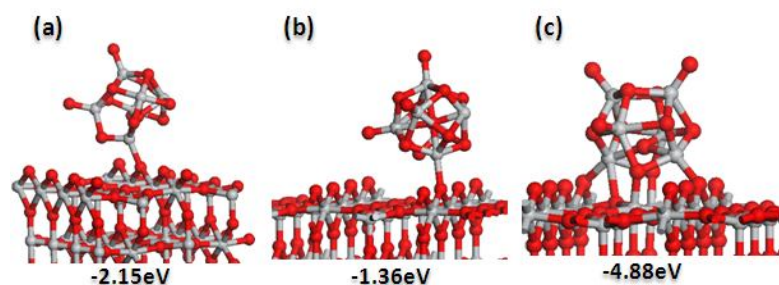

Figure S1 Relaxed adsorption structures with adsorption energies given in eV for different configurations of  $\text{Ti}_6\text{O}_{12}$  clusters on  $\text{TiO}_2$  rutile (110).

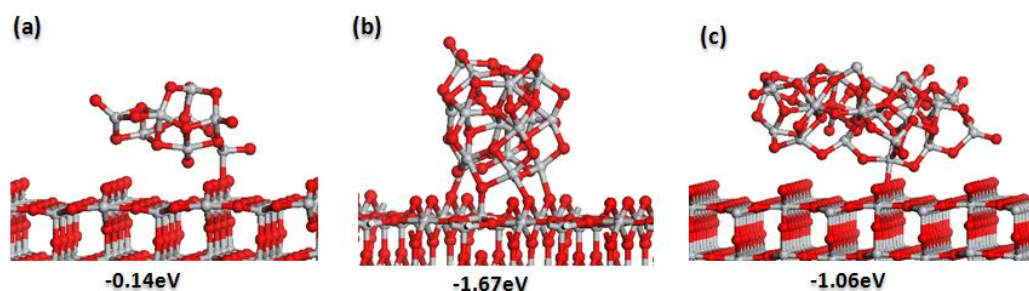

Figure S2 Relaxed adsorption structures with adsorption energies given in eV for (a)  $\text{Ti}_8\text{O}_{16}$ , (b)  $\text{Ti}_{16}\text{O}_{32}$ , (c)  $\text{Ti}_{30}\text{O}_{60}$  clusters on  $\text{TiO}_2$  rutile (110).

## Calculations on energetics in nanocluster aggregation

### 1. Free Nanoclusters

#### Formation of $\text{Ti}_8\text{O}_{16}$ from 2x $\text{Ti}_4\text{O}_8$ :

$$E(\text{Ti}_8\text{O}_{16}) = -168.443 \text{ eV}$$

$$E(2x\text{Ti}_4\text{O}_8) = -161.232 \text{ eV}$$

#### Formation of $\text{Ti}_{16}\text{O}_{32}$ from 2x $\text{Ti}_8\text{O}_{16}$

$$E(\text{Ti}_{16}\text{O}_{32}) = -344.417 \text{ eV}$$

$$E(2x \text{Ti}_8\text{O}_{16}) = -336.886 \text{ eV}$$

#### Formation of $\text{Ti}_{30}\text{O}_{60}$ from $\text{Ti}_6\text{O}_{12} + \text{Ti}_8\text{O}_{16} + \text{Ti}_{16}\text{O}_{32}$

$$E(\text{Ti}_{30}\text{O}_{60}) = -647.250 \text{ eV}$$

$$E(\text{Ti}_6\text{O}_{12} + \text{Ti}_8\text{O}_{16} + \text{Ti}_{16}\text{O}_{32}) = -635.088 \text{ eV}$$

### 2. Aggregation of Nanoclusters Supported on $\text{TiO}_2$

### Formation of Ti<sub>6</sub>O<sub>12</sub> compared to two Ti<sub>3</sub>O<sub>6</sub> clusters on the same rutile (110) (2x4) surface

$$E\{2(\text{Ti}_3\text{O}_6)\text{-rutile (110)}\} = -4482.857 \text{ eV}$$

$$E\{\text{Ti}_6\text{O}_{12}\text{-rutile (110)}\} + E\{\text{rutile (110)}\} = -4477.507 \text{ eV}$$

### Formation of Ti<sub>16</sub>O<sub>32</sub> compared to two Ti<sub>8</sub>O<sub>16</sub> clusters on the same rutile (110) (4x4) surface

$$E\{2(\text{Ti}_8\text{O}_{16})\text{-rutile (110)}\} = -6135.125 \text{ eV}$$

$$E\{\text{Ti}_{16}\text{O}_{32}\text{-rutile (110)}\} + E\{\text{rutile(110)}\} = -6134.395 \text{ eV}$$

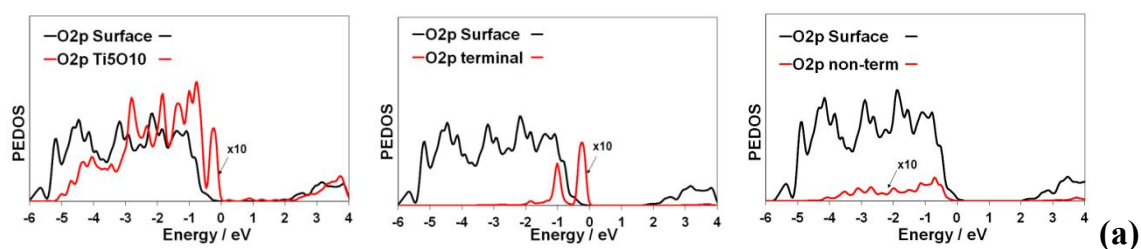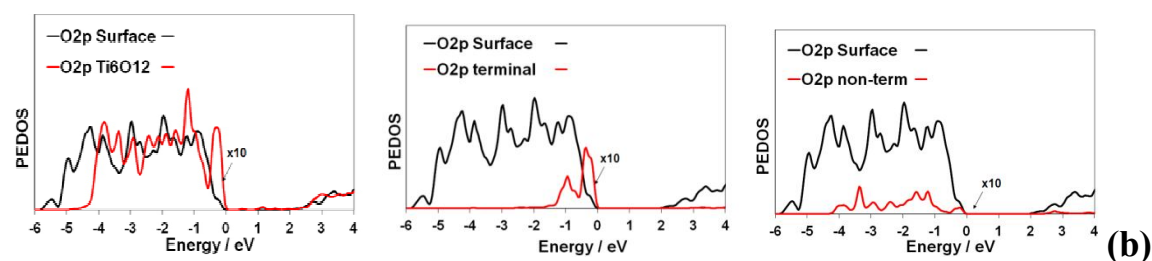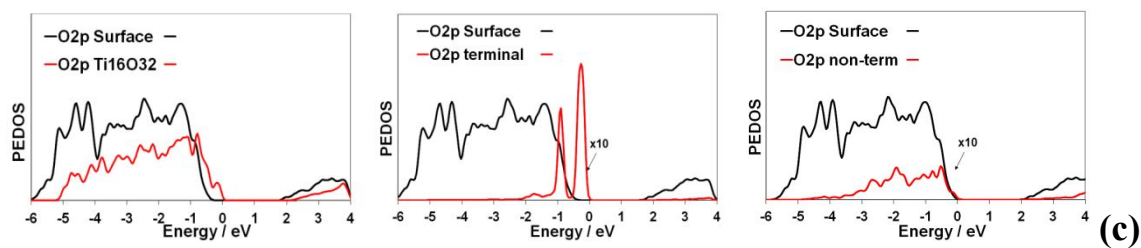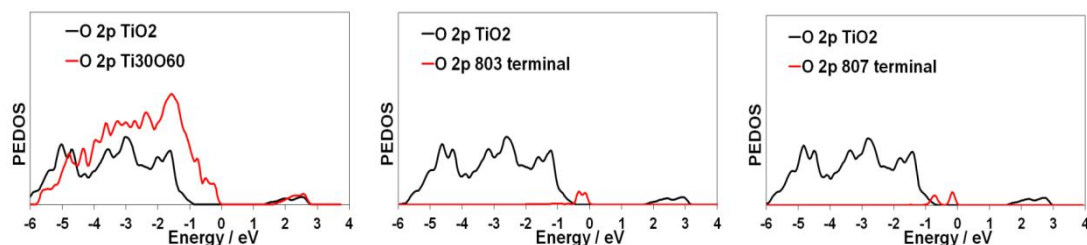

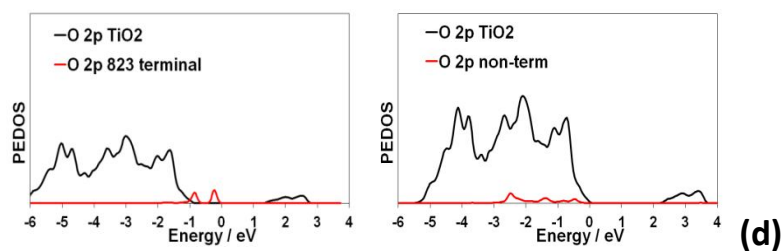

Figure S3: Electronic density of states projected (PEDOS) on O 2p states with terminal oxygen (denoted O 2p terminal) and non-terminal oxygen (denoted O 2p non-term) for: (a)  $\text{Ti}_5\text{O}_{10}$ , (b)  $\text{Ti}_6\text{O}_{12}$ , (c)  $\text{Ti}_{16}\text{O}_{32}$ , (d)  $\text{Ti}_{30}\text{O}_{60}$  clusters on  $\text{TiO}_2$  rutile (110) surface.

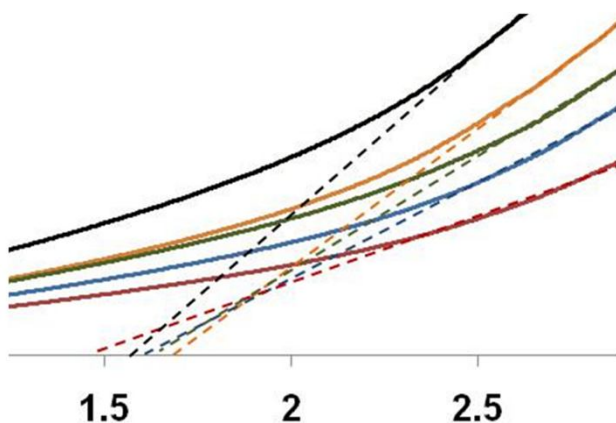

Figure S4: Absorption spectrum of nanocluster modified rutile (110) showing a zoom into the region around the photon energy corresponding to the extrapolated absorption energy.
